# Supplementary material for: British Thoracic Society survey of rehabilitation to support recovery of the post-COVID-19 population
Source: PubMed Central journal article supplement — BMJ Open. 2020 Dec 2;10(12):e040213. doi: 10.1136/bmjopen-2020-040213 (PMC7712930; doi:10.1136/bmjopen-2020-040213), 2020-12-02
Supplement: bmjopen-2020-040213supp001.pdf [file bmjopen-2020-040213supp001.pdf]

### Support of people recovering from Covid-19

We are developing guidance on the care of all people recovering from COVID-19, following either a hospital discharge or a managed episode in the community.

We would appreciate your opinion on various components of a support package focusing on recovery; the package at this stage would have a focus on the delivery of a holistic rehabilitation-based intervention. All data collected will be anonymised.

We are also hoping to secure views from those who have first-hand experience of treating COVID-19.

We hope the questionnaire should take less than five minutes of your time, and will help inform what might be the best approach to support people recovering from COVID-19.

We have identified a range of components that may be included in a recovery programme. We would like you to indicate whether you think these are essential components of the package.

Please complete this by Wednesday 15 April.

---

Could you please tell us a little bit about you? This informs the data collected and will not be used to identify individual responses in any way.

**1. What is your gender?**

- Male
- Female
- Prefer not to say

**2. What age are you?**

- 18-24
- 25-34
- 35-44
- 45-54
- 55-64
- 65+
- Prefer not to say

**3. What is your ethnicity?**

- White British
- White Irish
- Gypsy/Irish Traveller
- Any other White Background

- White and Black Caribbean
- White and Black African
- White and Asian
- Any other mixed/ multiple ethnic background
- Indian
- Bangladeshi
- Pakistani
- Chinese
- Any other Asian background
- African
- Caribbean
- Any other black background
- Arab
- Any other ethnic group
- Not stated
- Prefer not to say

**4. To what speciality do you belong?**

- Anaesthetics
- General Medicine
- Acute Medicine
- Respiratory
- Cardiac
- Healthcare of the Elderly
- Primary Care
- Sports and Exercise
- Psychology
- Psychiatry
- Other, please specify

**5. What is your professional status?**

- Consultant physician
- Trainee physician
- Nurse
- Physiotherapist

- Physician associate
- Speech and language therapist
- Occupational therapist
- Healthcare assistant
- Primary care physician
- Dietician
- Other, please specify

**6. Where are you based/in what environment do you work?**

- Acute hospital
- Community hospital/service
- Private hospital
- Primary care
- Other, please specify

**7. In what country/continent do you work?**

- England
- Scotland
- Wales
- Northern Ireland
- Rest of Europe
- North America
- South America
- Australasia
- Asia
- Africa
- Prefer not to say

**8. Have you been involved in the care of people with COVID-19?**

Please select all that apply

- Yes – ITU
- Yes – Acute Medical Ward
- Yes – step down unit
- Yes – Community
- No

- Other, please specify

**9. Are you routinely employed as part of a rehabilitation programme?**

- Please select all that apply
- Yes – pulmonary rehabilitation
- Yes – cardiac rehabilitation
- Yes – healthcare of the elderly
- No

Other – please specify

For the following questions, respondents were asked to give one of the following answers  
Strongly disagree, Disagree, Neutral, Agree, Strongly Agree, Unable to comment

**10. The essential components of an early phase recovery programme (first few weeks after discharge/episode) recovery programme are:**

- A home/step down unit aerobic exercise programme
- A home/step down unit resistance exercise programme
- An online/digital delivery is feasible for patients
- Advice on the management of cough
- Advice on the management of fatigue
- Advice on the management of breathlessness
- Advice on nutrition
- Psychological support for social isolation
- Support for mood disturbances (including anxiety and depression)
- Psychological support for Post Traumatic Stress Disorder (PTSD)
- Return to work advice
- Where to get financial support
- Symptom monitoring for worsening symptoms
- Dealing with grief and death of a family member

**11. The essential components of an assessment at 6-8 weeks post hospital (step down unit) discharge are:**

- An initial face to face (centre-based) assessment
- Conduct of an exercise test (6MWT/ISWT) at the time of the assessment
- Assessment of muscle strength (quadriceps)

- Assessment of quality of life
- Assessment of cough
- Assessment of fatigue
- Assessment of dyspnoea
- Assessment of mood (e.g. anxiety and depression)
- Screening for Post Traumatic Stress Disorder
- Medication review
- Assessment of nutritional status
- Assessment of comorbidities
- Measurement of lung function (spirometry)
- Assessment of oxygen requirements
- Further intervention is only needed if there is evidence of ongoing physical or psychological deficit

**12. The essential components of a continued recovery programme beyond 6 weeks post hospital (step down unit) discharge are:**

- A home-based progressive aerobic exercise programme
- A home-based progressive resistance exercise programme
- Advice on the management of cough
- Advice on the management of fatigue
- Advice on the management of breathlessness
- Psychological support for social isolation
- Support for mood disturbances (including anxiety and depression)
- Assessment of nutrition
- Psychological support for Post Traumatic Stress Disorder
- Return to work advice
- Where to get financial support
- Dealing with grief and death of a family member
- Advice on returning to usual exercise habits
- Advice on returning to usual employment
- Advice on returning to alternative employment
- Once social isolation policy is relaxed, advice for engaging in outdoors activities
- Once social isolation policy is relaxed, advice on community exercise schemes
- Assessment of lung function at 6 months

**13. Please provide your email address**

This will only be used to contact you for clarification regarding your answers

**14. Do you have any further comments or suggestions?**
